# Supplementary material
Source: PubMed Central journal article supplement (PMC4615196)
Supplement: krnb-12-04-1014291-s001.pdf [file krnb-12-04-1014291-s001.pdf]

**Table S1. Results of *PKD1* missense mutations analysis using NNSplice, ESEfinder and Rescue-ESE web sources.**

| Mutation | Exon | NNSplice <sup>(1)</sup> |              | Exon length (bp) | Position from exon ending (5'/3') | Clinical Significance <sup>(2)</sup> | Mutation effects on splice sites <sup>(3)</sup> |                                           | Number of disrupted ESE |            |
|----------|------|-------------------------|--------------|------------------|-----------------------------------|--------------------------------------|-------------------------------------------------|-------------------------------------------|-------------------------|------------|
|          |      | Acceptor (3'ss)         | Donor (5'ss) |                  |                                   |                                      | Functional splice sites                         | Activation / Creation of new splice sites | ESEfinder               | Rescue-ESE |
| p.R80W   | 1    |                         | 0,91         | 72               | 23 (5')                           | Indeterminate                        | -                                               | -                                         | 1                       | 0          |
| p.R80Q   | 1    |                         | 0,91         | 72               | 24 (5')                           | Likely neutral                       | -                                               | -                                         | 1                       | 0          |
| p.N101D  | 3    | 0,88                    | 0,97         | 72               | 14 (5')                           | Highly likely pathogenic             | A (0,84)                                        | -                                         | 0                       | 2          |
| p.N125D  | 4    | 0,84                    | 0,95         | 170              | 14 (5')                           | Highly likely pathogenic             | A (0,83)                                        | -                                         | 0                       | 0          |
| p.C155Y  | 4    | 0,84                    | 0,95         | 170              | 66 (3')                           | Highly likely pathogenic             | -                                               | -                                         | 0                       | 0          |
| p.G168A  | 4    | 0,84                    | 0,95         | 170              | 27 (3')                           | Likely neutral                       | -                                               | -                                         | 1                       | 0          |
| p.A401V  | 6    | 0,43                    | 0,37         | 187              | 1 (5')                            | Likely neutral                       | -                                               | -                                         | 0                       | 0          |
| p.P404R  | 6    | 0,43                    | 0,37         | 187              | 10 (5')                           | Likely neutral                       | -                                               | -                                         | 1                       | 0          |
| p.R454C  | 6    | 0,43                    | 0,37         | 187              | 26 (3')                           | Indeterminate                        | -                                               | -                                         | 1                       | 0          |
| p.R454P  | 6    | 0,43                    | 0,37         | 187              | 25 (3')                           | Indeterminate                        | -                                               | -                                         | 1                       | 0          |
| p.V460D  | 6    | 0,43                    | 0,37         | 187              | 7 (3')                            | Likey pathogenic                     | A (0,32)                                        | -                                         | 0                       | 0          |
| p.V460A  | 6    | 0,43                    | 0,37         | 187              | 7 (3')                            | Likely pathogenic                    | -                                               | -                                         | 0                       | 0          |
| p.V466L  | 7    | 0,65                    | 0,56         | 218              | 11 (5')                           | Indeterminate                        | A (0,6)                                         | -                                         | 0                       | 0          |
| p.V466M  | 7    | 0,65                    | 0,56         | 218              | 11 (5')                           | Indeterminate                        | -                                               | -                                         | 1                       | 0          |
| p.S471L  | 7    | 0,65                    | 0,56         | 218              | 27 (5')                           | Indeterminate                        | -                                               | -                                         | 1                       | 0          |
| p.L532V  | 7    | 0,65                    | 0,56         | 218              | 13 (3')                           | Likely neutral                       | -                                               | -                                         | 0                       | 0          |
| p.L656Q  | 10   | 0,98                    | 0,72         | 127              | 118 (5')                          | Likely pathogenic                    | -                                               | (c) A (0,86)                              | 0                       | 0          |
| p.V690D  | 10   | 0,98                    | 0,72         | 248              | 29 (3')                           | Highly likely pathogenic             | -                                               | -                                         | 1                       | 0          |
| p.Y698D  | 10   | 0,98                    | 0,72         | 248              | 6 (3')                            | Likely neutral                       | D (0,48)                                        | -                                         | 0                       | 0          |
| p.V715F  | 11   | 1                       | 0,99         | 756              | 46 (5')                           | Likely neutral                       | -                                               | (+) A (0,82)                              | 0                       | 0          |
| p.S903G  | 11   | 1                       | 0,99         | 756              | 147 (3')                          | Likely neutral                       | -                                               | (+) D (0,87)                              | 0                       | 0          |
| p.A990L  | 12   | 0,73                    | 0,001        | 132              | 18-17 (3')                        | Likely neutral                       | -                                               | -                                         | 2                       | 0          |
| p.L1054P | 13   | 0,8                     | 0,85         | 132              | 1 (3')                            | Indeterminate                        | -                                               | -                                         | 0                       | 0          |
| p.G2310R | 16   | 0,95                    | 0,71         | 150              | 13 (5')                           | Likely neutral                       | -                                               | (+) D (0,65)                              | 0                       | 0          |
| p.Q2354R | 16   | 0,95                    | 0,71         | 150              | 5 (3')                            | Likely Pathogenic                    | D (0,48)                                        | -                                         | 1                       | 1          |
| p.A2375V | 17   | 0,72                    | 0,95         | 144              | 85 (3')                           | Likely Pathogenic                    | -                                               | (c) D (0,9)                               | 0                       | 1          |
| p.R2404W | 18   | 0,83                    | 0,99         | 280              | 1 (5')                            | Likely neutral                       | -                                               | -                                         | 1                       | 0          |
| p.W2405R | 18   | 0,83                    | 0,99         | 280              | 4 (5')                            | Highly Likely Pathogenic             | -                                               | -                                         | 0                       | 0          |
| p.R2408C | 18   | 0,83                    | 0,99         | 280              | 13 (5')                           | Likely pathogenic                    | -                                               | -                                         | 2                       | 0          |
| p.V2628M | 21   | 0,67                    | 0,31         | 153              | 9 (5')                            | Likely neutral                       | -                                               | -                                         | 2                       | 0          |
| p.A2704V | 22   | 0,57                    | 0,69         | 145              | 51 (3')                           | Likely neutral                       | -                                               | (+) A (0,63)                              | 0                       | 0          |
| p.G2814R | 23   | 0,57                    | 0,95         | 630              | 278 (5')                          | Likely neutral                       | -                                               | (c) A (0,81)                              | 0                       | 0          |
| p.S2935F | 24   | 0,83                    | 0,91         | 157              | 13 (5')                           | Indeterminate                        | -                                               | -                                         | 1                       | 0          |
| p.F2978T | 24   | 0,83                    | 0,91         | 157              | 17-16 (3')                        | Likely Pathogenic                    | -                                               | -                                         | 0                       | 1          |
| p.F2978C | 24   | 0,83                    | 0,91         | 157              | 16 (3')                           | Likely Pathogenic                    | -                                               | -                                         | 0                       | 1          |
| p.F2978S | 24   | 0,83                    | 0,91         | 157              | 16 (3')                           | Likely Pathogenic                    | -                                               | -                                         | 0                       | 1          |
| p.M3023K | 25   | 0,97                    | 0,82         | 253              | 120 (5')                          | Likely neutral                       | -                                               | (+) D (0,71)                              | 0                       | 0          |
| p.E3068Q | 26   | 0,84                    | 0,96         | 196              | 1 (5')                            | Likely neutral                       | A (0,23)                                        | -                                         | 0                       | 0          |
| p.E3068D | 26   | 0,84                    | 0,96         | 196              | 3 (5')                            | Indeterminate                        | -                                               | -                                         | 0                       | 0          |
| p.P3069L | 26   | 0,84                    | 0,96         | 196              | 5 (5')                            | Indeterminate                        | -                                               | -                                         | 1                       | 0          |

|          |    |      |      |      |            |                          |          |              |   |   |
|----------|----|------|------|------|------------|--------------------------|----------|--------------|---|---|
| p.N3074K | 26 | 0,84 | 0,96 | 196  | 21 (5')    | Likely Pathogenic        | -        | -            | 0 | 3 |
| p.C3112F | 26 | 0,84 | 0,96 | 196  | 63 (3')    | Highly Likely Pathogenic | -        | -            | 0 | 0 |
| p.R3117H | 26 | 0,84 | 0,96 | 196  | 48 (3')    | Likely neutral           | -        | -            | 0 | 0 |
| p.R3130W | 26 | 0,84 | 0,96 | 196  | 10 (3')    | Likely pathogenic        | -        | -            | 2 | 0 |
| p.S3132L | 26 | 0,84 | 0,96 | 196  | 3 (3')     | Likely pathogenic        | -        | -            | 0 | 0 |
| p.T3135M | 27 | 1    | 0,87 | 171  | 7 (5')     | Likely pathogenic        | -        | -            | 2 | 0 |
| p.H3137Y | 27 | 1    | 0,87 | 171  | 12 (5')    | Likely pathogenic        | -        | -            | 0 | 0 |
| p.G3139V | 27 | 1    | 0,87 | 171  | 18 (5')    | Indeterminate            | -        | -            | 0 | 0 |
| p.R3169Q | 27 | 1    | 0,87 | 171  | 63 (3')    | Likely neutral           | -        | -            | 0 | 0 |
| p.N3188I | 27 | 1    | 0,87 | 171  | 6 (3')     | Likely Pathogenic        | -        | -            | 1 | 0 |
| p.P3193A | 28 | 0,98 | 0,56 | 144  | 9 (5')     | Indeterminate            | -        | -            | 1 | 0 |
| p.P3193S | 28 | 0,98 | 0,56 | 144  | 9 (5')     | Likely Pathogenic        | -        | -            | 1 | 0 |
| p.K3232E | 28 | 0,98 | 0,56 | 144  | 19 (3')    | Indeterminate            | -        | -            | 0 | 1 |
| p.E3233V | 28 | 0,98 | 0,56 | 144  | 15 (3')    | Likely pathogenic        | -        | -            | 0 | 1 |
| p.A3240T | 29 | 0,95 | 0,92 | 211  | 6 (5')     | Likely neutral           | -        | -            | 1 | 0 |
| p.R3244C | 29 | 0,95 | 0,92 | 211  | 18 (5')    | Indeterminate            | -        | -            | 0 | 0 |
| p.R3244H | 29 | 0,95 | 0,92 | 211  | 19 (5')    | Likely neutral           | -        | -            | 1 | 0 |
| p.T3309M | 30 | 0,9  | 0,63 | 127  | 3 (5')     | Likely Pathogenic        | A (0,82) | -            | 1 | 0 |
| p.D3469N | 33 | 0,87 | 0,99 | 185  | 1 (3')     | Likely Pathogenic        | D (0,68) | -            | 0 | 1 |
| p.D3469Y | 33 | 0,87 | 0,99 | 185  | 1 (3')     | Highly Likely Pathogenic | D (0,60) | -            | 0 | 1 |
| p.G3540R | 35 | 0,75 | 0,68 | 119  | 1 (3')     | Likely Pathogenic        | D (0,07) | -            | 0 | 0 |
| p.G3540A | 36 | 0,95 | 0,98 | 119  | 1 (5')     | Likely neutral           | A (0,84) | -            | 1 | 0 |
| p.L3610P | 37 | 0,91 | 0,67 | 195  | 8 (5')     | Indeterminate            | -        | -            | 1 | 1 |
| p.L3654V | 37 | 0,91 | 0,67 | 195  | 57 (3')    | Likely Pathogenic        | -        | -            | 0 | 0 |
| p.R3672P | 37 | 0,91 | 0,67 | 195  | 2 (3')     | Likely Pathogenic        | -        | -            | 0 | 0 |
| p.R3672Q | 37 | 0,91 | 0,67 | 195  | 2 (3')     | Likely neutral           | -        | -            | 0 | 0 |
| p.L3682Q | 38 | 0,34 | 0,97 | 140  | 29 (5')    | Highly likely pathogenic | -        | -            | 0 | 0 |
| p.W3726R | 39 | 0,29 | 0,88 | 113  | 20 (5')    | Highly likely pathogenic | -        | -            | 0 | 1 |
| p.W3726S | 39 | 0,29 | 0,88 | 113  | 21 (5')    | Highly likely pathogenic | -        | -            | 0 | 1 |
| p.R3750Q | 39 | 0,29 | 0,88 | 113  | 21-20 (3') | Highly likely pathogenic | -        | (+) D (0,76) | 1 | 0 |
| p.R3753L | 39 | 0,29 | 0,88 | 113  | 12 (3')    | Highly likely pathogenic | -        | -            | 1 | 0 |
| p.P3762L | 40 | 0,34 | 0,82 | 142  | 16 (5')    | Indeterminate            | A (0,23) | -            | 2 | 0 |
| p.E3853K | 42 | 0,51 | 0,99 | 175  | 20 (5')    | Likely Pathogenic        | A (0,43) | -            | 1 | 0 |
| p.S3904L | 42 | 0,51 | 0,99 | 175  | 2 (3')     | Indeterminate            | -        | -            | 0 | 0 |
| p.S3904W | 42 | 0,51 | 0,99 | 175  | 2 (3')     | Indeterminate            | -        | -            | 0 | 0 |
| p.C3906F | 43 | 0,66 | 0,99 | 175  | 5 (5')     | Likely neutral           | A (0,59) | -            | 0 | 0 |
| p.S3976I | 43 | 0,66 | 0,99 | 291  | 77 (3')    | Likely Pathogenic        | -        | (+) A (0,63) | 0 | 0 |
| p.A3987G | 43 | 0,66 | 0,99 | 291  | 44 (3')    | Likely neutral           | -        | -            | 0 | 0 |
| p.R4007C | 44 | 0,85 | 0,82 | 135  | 16 (5')    | Highly likely pathogenic | -        | -            | 0 | 0 |
| p.I4045V | 44 | 0,85 | 0,82 | 135  | 6 (3')     | Likely neutral           | D (0,75) | (+) A (0,81) | 0 | 0 |
| p.L4137P | 45 | 0,95 | 0,91 | 306  | 35 (3')    | Highly Likely Pathogenic | -        | -            | 2 | 0 |
| p.L4139P | 45 | 0,95 | 0,91 | 306  | 29 (3')    | Highly likely pathogenic | -        | -            | 1 | 0 |
| p.S4144T | 45 | 0,95 | 0,91 | 306  | 14 (3')    | Indeterminate            | -        | -            | 1 | 0 |
| p.F4149F | 46 | 0,56 |      | 1485 | 3 (5')     | Likely neutral           | A (0,44) | -            | 0 | 0 |
| p.R4150C | 46 | 0,56 |      | 1485 | 4 (5')     | Highly Likely Pathogenic | -        | -            | 0 | 0 |
| p.R4150H | 46 | 0,56 |      | 1485 | 5 (5')     | Indeterminate            | A (0,5)  | -            | 0 | 0 |
| p.K4152T | 46 | 0,56 |      | 1485 | 11 (5')    | Indeterminate            | A (0,52) | -            | 1 | 1 |
| p.V4153V | 46 | 0,56 |      | 1485 | 15 (5')    | Likely neutral           | -        | -            | 1 | 0 |
| p.R4154C | 46 | 0,56 |      | 1485 | 16 (5')    | Likely pathogenic        | A (0,4)  | -            | 0 | 0 |
| p.S4190F | 46 | 0,56 |      | 1486 | 125 (5')   | Likely neutral           | -        | (+) A (0,72) | 0 | 0 |

<sup>(1)</sup> NNSplice scores of functional splice sites.

<sup>(2)</sup> According to ADPKD Mutation Database classification

<sup>(3)</sup> Splice sites scores obtained from NNSplice are indicated (in brackets)

(+): Activation of new splice site

(c): Creation of new splice site

- : No changes /no significant changes in functional splice site scores (based on NNSplice analysis)

A: Acceptor (3' ss)

D: Donor (5' ss)

**Table S2. Results of *PKD1* synonymous mutations analysis using NNSplice, ESEfinder and Rescue-ESE web sources.**

| Mutation   | Exon | NNSplice <sup>(1)</sup> |              | Exon length (bp) | Position from exon ending (5'/3') | Clinical Significance <sup>(2)</sup> | Mutation effects on splice sites <sup>(3)</sup> |                                           | Number of disrupted ESE |            |
|------------|------|-------------------------|--------------|------------------|-----------------------------------|--------------------------------------|-------------------------------------------------|-------------------------------------------|-------------------------|------------|
|            |      | Acceptor (3'ss)         | Donor (5'ss) |                  |                                   |                                      | Functional splice sites                         | Activation / Creation of new splice sites | ESEfinder               | Rescue-ESE |
| c.214C>T   | 1    |                         | 0,86         | 423              | 2 (3')                            | Likely neutral                       | D (0,76)                                        | -                                         | 0                       | 0          |
| c.288G>A   | 3    | 0,88                    | 0,97         | 72               | 1 (5')                            | Likely neutral                       | A (0,82)                                        | -                                         | 0                       | 0          |
| c.423G>A   | 4    | 0,84                    | 0,95         | 170              | 63 (5')                           | Likely neutral                       | -                                               | -                                         | 1                       | 0          |
| c.570C>T   | 5    | 0,94                    | 1            | 672              | 41 (5')                           | Likely neutral                       | -                                               | (+) D (0,85)                              | 0                       | 0          |
| c.588C>T   | 5    | 0,94                    | 1            | 672              | 51 (5')                           | Likely neutral                       | -                                               | -                                         | 0                       | 0          |
| c.759A>G   | 5    | 0,94                    | 1            | 672              | 230 (5')                          | Likely neutral                       | -                                               | -                                         | 0                       | 0          |
| c.789C>T   | 5    | 0,94                    | 1            | 672              | 260 (5')                          | Likely neutral                       | -                                               | -                                         | 0                       | 0          |
| c.837G>A   | 5    | 0,94                    | 1            | 672              | 365 (3')                          | Likely neutral                       | -                                               | -                                         | 0                       | 0          |
| c.1185C>T  | 5    | 0,94                    | 1            | 672              | 17 (3')                           | Likely neutral                       | -                                               | (c) D (0,77)                              | 0                       | 0          |
| c.1209C>T  | 6    | 0,43                    | 0,37         | 187              | 8 (5')                            | Likely neutral                       | A (0,29)                                        | -                                         | 1                       | 0          |
| c.1248C>T  | 6    | 0,43                    | 0,37         | 187              | 3 (3')                            | Likely neutral                       | -                                               | -                                         | 1                       | 0          |
| c.1602C>T  | 7    | 0,65                    | 0,56         | 218              | 5 (3')                            | Likely neutral                       | D (0,55)                                        | -                                         | 0                       | 0          |
| c.1710C>T  | 8    | 0,77                    | 0,56         | 116              | 13 (3')                           | Likely neutral                       | -                                               | -                                         | 1                       | 0          |
| c.1737G>A  | 9    | 0,44                    | 0,62         | 127              | 15 (5')                           | Likely neutral                       | A (0,4)                                         | -                                         | 0                       | 0          |
| c.2082C>T  | 10   | 0,98                    | 0,72         | 248              | 16 (3')                           | Likely neutral                       | -                                               | -                                         | 1                       | 0          |
| c.2439C>T  | 11   | 1                       | 0,99         | 756              | 342 (5')                          | Likely neutral                       | -                                               | -                                         | 0                       | 0          |
| c.2109C>T  | 11   | 1                       | 0,99         | 756              | 12 (5')                           | Likely neutral                       | -                                               | -                                         | 2                       | 0          |
| c.2829C>G  | 11   | 1                       | 0,99         | 756              | 15 (3')                           | Likely neutral                       | -                                               | -                                         | 1                       | 0          |
| c.6927C>T  | 16   | 0,95                    | 0,71         | 150              | 12 (5')                           | Likely neutral                       | -                                               | -                                         | 0                       | 0          |
| c.7077G>C  | 17   | 0,72                    | 0,95         | 144              | 12 (5')                           | Likely neutral                       | A (0,7)                                         | -                                         | 0                       | 0          |
| c.7485C>T  | 18   | 0,83                    | 0,99         | 280              | 5 (3')                            | Likely neutral                       | -                                               | -                                         | 1                       | 0          |
| c.7491C>T  | 19   | 0,51                    | 1            | 214              | 2 (5')                            | Likely neutral                       | -                                               | -                                         | 0                       | 0          |
| c.7500C>T  | 19   | 0,51                    | 1            | 214              | 11 (5')                           | Likely neutral                       | A (0,48)                                        | -                                         | 0                       | 0          |
| c.7503G>A  | 19   | 0,51                    | 1            | 214              | 14 (5')                           | Likely neutral                       | A (0,49)                                        | -                                         | 0                       | 0          |
| c.7623G>A  | 19   | 0,51                    | 1            | 214              | 81 (3')                           | Likely neutral                       | -                                               | (+) A (0,65)                              | 0                       | 0          |
| c.7866C>T  | 21   | 0,67                    | 0,31         | 153              | 3 (5')                            | Likely neutral                       | A (0,52)                                        | -                                         | 0                       | 0          |
| c.8334C>T  | 23   | 0,57                    | 0,95         | 630              | 173 (5')                          | Likely neutral                       | -                                               | (c) D (0,81)                              | 0                       | 0          |
| c-8559C>T  | 23   | 0,57                    | 0,95         | 630              | 233 (3')                          | Likely neutral                       | -                                               | (+) A (0,46)                              | 0                       | 0          |
| c.8949G>A  | 25   | 0,97                    | 0,82         | 253              | 1 (5')                            | Likely neutral                       | A (0,93)                                        | -                                         | 0                       | 0          |
| c.8964G>A  | 25   | 0,97                    | 0,82         | 253              | 16 (5')                           | Likely neutral                       | -                                               | -                                         | 1                       | 0          |
| c.9186C>A  | 25   | 0,97                    | 0,82         | 253              | 16 (3')                           | Likely neutral                       | -                                               | (+) D (0,66)                              | 1                       | 0          |
| c.9213G>A  | 26   | 0,84                    | 0,96         | 196              | 12 (5')                           | Likely neutral                       | A (0,77)                                        | -                                         | 1                       | 0          |
| c.9573C>G  | 28   | 0,98                    | 0,56         | 144              | 5 (5')                            | Likely neutral                       | -                                               | -                                         | 1                       | 0          |
| c.9714C>T  | 29   | 0,95                    | 0,92         | 211              | 2 (5')                            | Likely neutral                       | -                                               | -                                         | 0                       | 0          |
| c.9888C>T  | 29   | 0,95                    | 0,92         | 211              | 36 (3')                           | Likely neutral                       | -                                               | -                                         | 0                       | 0          |
| c.10159C>G | 31   | 0,97                    | 0,99         | 117              | 9 (3')                            | Likely neutral                       | -                                               | -                                         | 1                       | 0          |
| c.10163C>T | 31   | 0,97                    | 0,99         | 117              | 5 (3')                            | Likely neutral                       | -                                               | (+) A (0,88)                              | 0                       | 0          |
| c.10290G>A | 33   | 0,87                    | 0,99         | 185              | 70 (5')                           | Likely Neutral                       | -                                               | (c) A (0,79)                              | 0                       | 0          |

|            |    |      |      |      |          |                |   |              |   |   |
|------------|----|------|------|------|----------|----------------|---|--------------|---|---|
| c.11007C>T | 37 | 0,91 | 0,67 | 195  | 10 (3')  | Likely Neutral | - | (c) D (0,74) | 0 | 0 |
| c.11143C>T | 38 | 0,34 | 0,97 | 140  | 14 (3')  | Likely Neutral | - | -            | 1 | 0 |
| c.11313G>A | 40 | 0,34 | 0,82 | 142  | 44 (5')  | Likely neutral | - | (+) A (0,41) | 0 | 0 |
| c.11523C>T | 41 | 0,76 | 0,89 | 126  | 15 (3')  | Likely neutral | - | -            | 1 | 2 |
| c.11700T>C | 42 | 0,51 | 0,99 | 175  | 13 (3')  | Likely neutral | - | -            | 2 | 0 |
| c.11733C>A | 43 | 0,66 | 0,99 | 291  | 21 (5')  | Likely neutral | - | (c) A (0,67) | 0 | 0 |
| c.12153T>C | 45 | 0,95 | 0,91 | 306  | 15 (5')  | Likely neutral | - | -            | 1 | 0 |
| c.12264G>A | 45 | 0,95 | 0,91 | 306  | 126 (5') | Likely neutral | - | (c) A (0,85) | 1 | 0 |
| c.12402G>A | 45 | 0,95 | 0,91 | 306  | 43 (3')  | Likely neutral | - | -            | 0 | 0 |
| c.12409C>T | 45 | 0,95 | 0,91 | 306  | 36 (3')  | Likely neutral | - | (+) A (0,81) | 1 | 0 |
| c.12570C>T | 46 | 0,56 |      | 1485 | 125 (5') | Likely neutral | - | (+) A (0,82) | 0 | 0 |

---

<sup>(1)</sup> NNSplice scores of functional splice sites.

<sup>(2)</sup> According to ADPKD Mutation Database classification

<sup>(3)</sup> Splice sites scores obtained from NNSplice are indicated (in brackets)

(+): Activation of new splice site

(c): Creation of new splice site

- : No changes /no significant changes in functional splice site scores (based on NNSplice analysis)

A: Acceptor (3'ss)

D: Donor (5'ss)

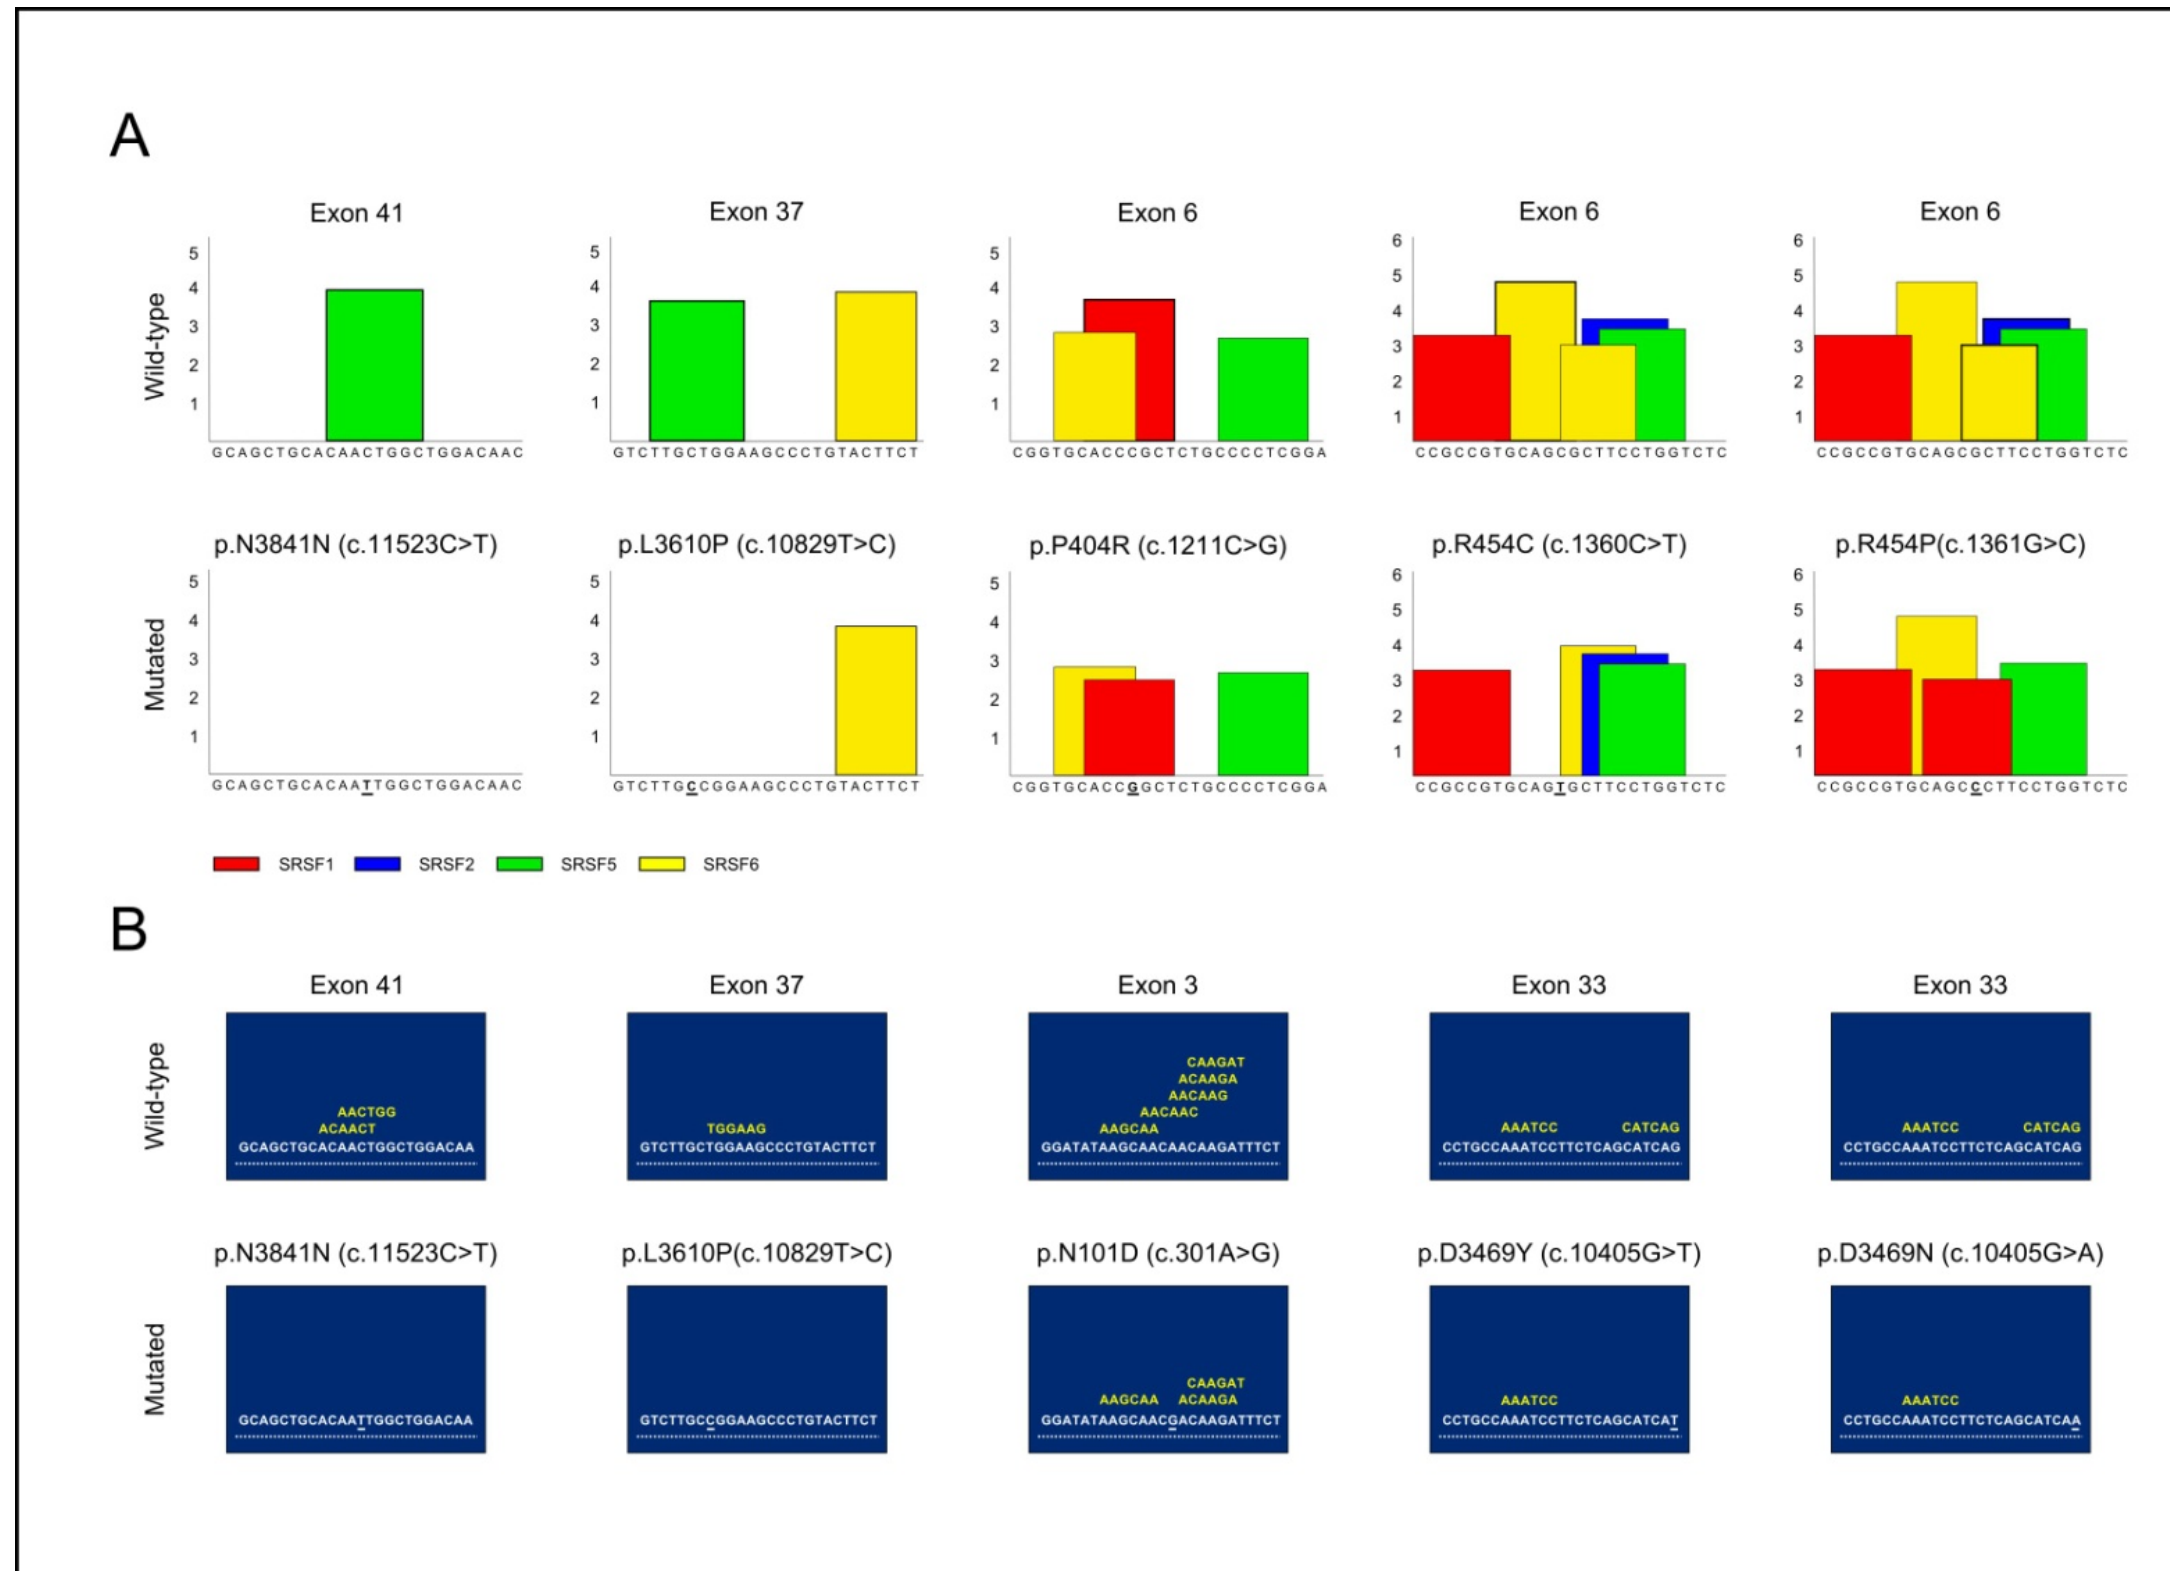

**Figure S1. Effects of missense and synonymous *PKD1* mutations on ESEs according to prediction tools.** The analysis of several previously reported mutations and their respective controls is shown. Potential ESE sequences were detected using ESEfinder (A) and Rescue-ESE (B) bioinformatics tools, respectively. The nucleotide changed by each mutation is underlined. In panel A, the high of the colored bars represents the motif score, and the width of the bars show the length of the motif (in nucleotides). Boxes in red, green, blue and yellow indicate potential binding sites for SR proteins SRSF1, SRSF5, SRSF2 and SRSF6, respectively.
